# Supplementary material for: The interaction of Arabidopsis with Piriformospora indica shifts from initial transient stress induced by fungus-released chemical mediators to a mutualistic interaction after physical contact of the two symbionts
Source: PubMed Central journal article supplement (PMC4384353; doi:10.1186/s12870-015-0419-3), 2015-02-21
Supplement: 12870_2015_419_MOESM1_ESM.pdf [file 12870_2015_419_MOESM1_ESM.pdf]

# **The interaction of *Arabidopsis* with *Piriformospora indica* shifts from initial transient stress induced by fungus-released chemical mediators to a mutualistic interaction after physical contact of the two symbionts**

Khabat Vahabi<sup>1</sup>, Irena Sherameti<sup>1</sup>, Madhunita Bakshi<sup>1</sup>, Anna Mrozinska<sup>1</sup>, Anatoli Ludwig<sup>1</sup>, Michael Reichelt<sup>2</sup>, Ralf Oelmüller<sup>1\*</sup>

<sup>1</sup>Institute of General Botany and Plant Physiology, Friedrich-Schiller-University Jena, Dornburger Str. 159, 07743 Jena, Germany

<sup>2</sup>Max-Planck Institute for Chemical Ecology, Hans-Knöll-Straße 8, 07745 Jena, Germany

(1) Khabat Vahabi

E-mail: [khabat.v@gmail.com](mailto:khabat.v@gmail.com)

(2) Irena Sherameti

E-mail: [irena.sherameti@uni-jena.de](mailto:irena.sherameti@uni-jena.de)

(3) Madhunita Bakshi

E-mail: [bakshi.madhunita@gmail.com](mailto:bakshi.madhunita@gmail.com)

(4) Anna Mrozinska

E-mail: [amrozinska@ice.mpg.de](mailto:amrozinska@ice.mpg.de)

(5) Anatoli Ludwig

E-mail: [aludwig82@gmail.com](mailto:aludwig82@gmail.com)

(6) Michael Reichelt

E-mail: [reichelt@ice.mpg.de](mailto:reichelt@ice.mpg.de)

(7)\***Correspondence:** Ralf Oelmüller

E-mail: [b7oera@uni-jena.de](mailto:b7oera@uni-jena.de)

Tel.: +49 3641 949231

Fax: +49 3641 949232

**Running title:** *P. indica*'s interaction with *Arabidopsis*

## Additional File 1

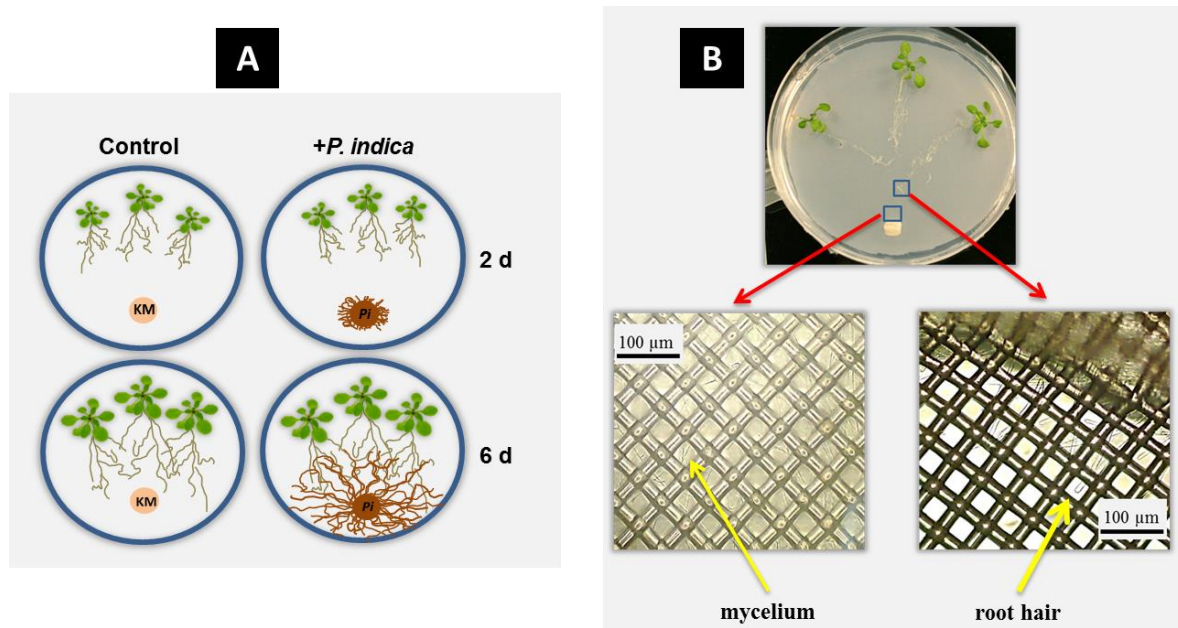

**Figure S1.** Experimental design for the co-cultivation assays. **(A)** Twelve day-old (48 h cold-treatment and 10 days of illumination) *Arabidopsis* seedlings were transferred to a nylon membrane on top of PNM medium in a Petri dish. A fungal plaque with *P. indica* which was grown on Kaefer medium (*Pi*), or without *P. indica* (KM) was posed 3 cm away from the closest root material. *A. thaliana* seedlings with *Pi*/KM treatment were cultivated for two or six days before analyses. **(B)** The position of the fungal hyphae and root hairs can easily be distinguished on the nylon net.

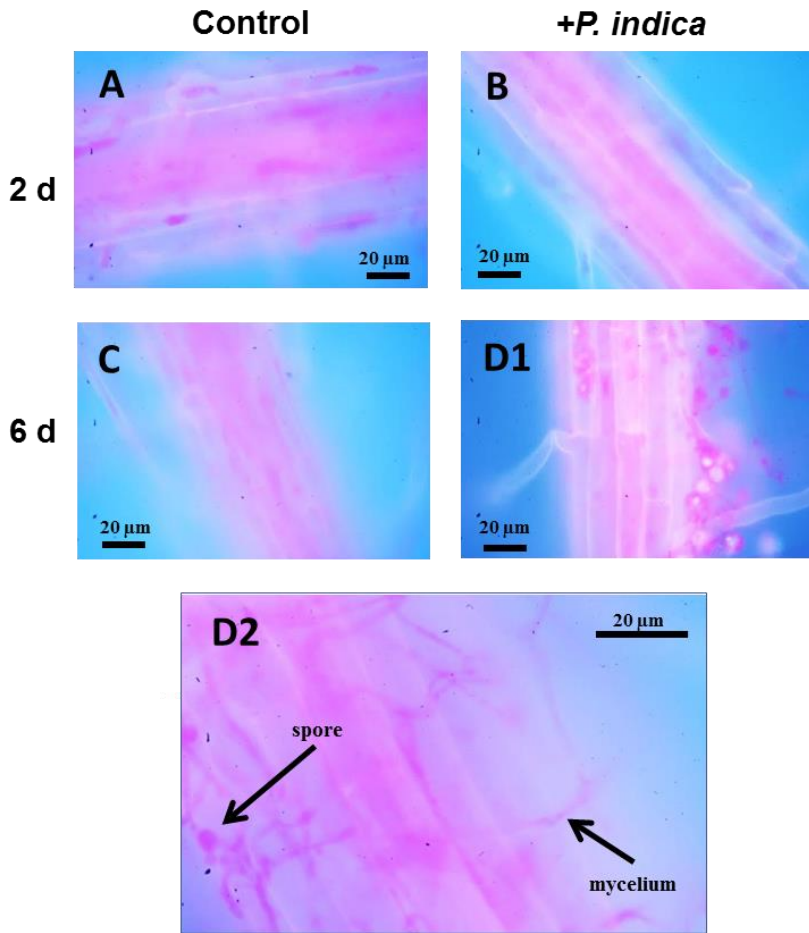

**Figure S2.** Localization of *P. indica* mycelium and spores in and around Arabidopsis roots. The roots of Arabidopsis seedlings exposed to *P. indica* for two or six days were stained with trypan blue and the spores and mycelium were detected by fluorescent microscopy. No fungal material can be detected in the control (A and C) as well as two days after exposure to *P. indica* (B). After the co-cultivation for six days, spores and mycelium are visible (D1 and D2 with different magnifications).

**Table S1.** MAPMAN analysis of the genes which are regulated at least 3-fold in the roots of seedlings exposed to *P. indica* for two or six days. Two days: genes which are only regulated two days after co-cultivation. Six days: genes which are only regulated six days after co-cultivation. [2 and 6] days: common genes which are regulated at both time points. Regulation was determined relative to the control (agar plaque without fungal hyphae). The microarray data for seedlings at  $t = 0$  and seedlings exposed to the agar plug without hyphae for two or six days were almost identical. Fold-regulation is given as  $\log_{10}$  values. The results show the average of three independent biological experiments with 2-3 technical RT-PCR reactions.

**(A)** Genes up- or down-regulated only at two days after co-cultivation. **(B)** Common genes up- or down-regulated at [2 and 6] days after co-cultivation. **(C)** Genes up- or down-regulated only at six days after co-cultivation. **(D)** 33 genes were randomly chosen and their regulation was tested by Real-time PCR analysis.

**Table S1A.** Genes up- or down-regulated only at two days after co-cultivation.

| Nr. | BinName                                                                                       | AGI       | Description                                                                                                 | 2 d + <i>P. indica</i> |
|-----|-----------------------------------------------------------------------------------------------|-----------|-------------------------------------------------------------------------------------------------------------|------------------------|
| 1   | aminoacid metabolism, synthesis                                                               | At5g05730 | ASA1 (anthranilate synthase subunit 1)                                                                      | 1.11                   |
| 2   | development, unspecified                                                                      | At2g38860 | YLS5                                                                                                        | 1.03                   |
| 3   | development, unspecified                                                                      | At4g35770 | SEN1 (SENESCENCE 1)                                                                                         | -1.66                  |
| 4   | DNA synthesis/chromatin structure                                                             | At2g18050 | HIS1-3 (HISTONE H1-3)                                                                                       | -1.77                  |
| 5   | hormone metabolism, auxin induced                                                             | At1g59500 | GH3.4 (indole-3-acetic acid amido synthetase)                                                               | 1.22                   |
| 6   | hormone metabolism, ethylene induced, co-factor and vitamine metabolism                       | At2g38230 | PDX1.1 (Pyridoxine biosynthesis 1.1)                                                                        | -1.43                  |
| 7   | minor CHO metabolism, raffinose family, galactinol synthases, putative                        | At1g60470 | GolS4 Arabidopsis thaliana (Galactinol Synthase 4, transferase)                                             | 1.52                   |
| 8   | cytochrome P450                                                                               | At2g24180 | CYP71B6 (CYTOCHROME P450 71B6, electron carrier/heme binding/iron ion binding/monooxygenase/oxygen binding) | 1.25                   |
| 9   | cytochrome P450                                                                               | At3g26830 | PAD3 (PHYTOALEXIN DEFICIENT 3, dihydrocamalexin acid decarboxylase/monooxygenase/oxygen binding)            | 1.65                   |
| 10  | cytochrome P450                                                                               | At4g37370 | CYP81D8 (electron carrier/heme binding/iron ion binding/monooxygenase/oxygen binding)                       | 1.45                   |
| 11  | glutathione S transferases                                                                    | At2g02930 | ATGSTF3 (GLUTATHIONE S-TRANSFERASE F3)                                                                      | 1.22                   |
| 12  | glutathione S transferases                                                                    | At5g02780 | In2-1 protein, putative                                                                                     | 1.45                   |
| 13  | nitrilases                                                                                    | At2g30670 | tropinone reductase, putative                                                                               | 2.80                   |
| 14  | plastocyanin-like                                                                             | At5g20230 | BCB BLUE-COPPER-BINDING PROTEIN, copper ion binding/electron carrier                                        | 1.10                   |
| 15  | protease inhibitor/seed storage/lipid transfer protein LTP                                    | At4g12550 | AIR1 (lipid binding)                                                                                        | -1.33                  |
| 16  | UDP glucosyl and glucuronyl transferases                                                      | At2g16890 | UDP-glucuronosyl/UDP-glucosyl transferase                                                                   | -1.46                  |
| 17  | UDP glucosyl and glucuronyl transferases                                                      | At3g21560 | UGT84A2, UDP-glycosyltransferase/sinapate 1-glucosyltransferase                                             | -1.18                  |
| 18  | UDP glucosyl and glucuronyl transferases                                                      | At3g53150 | UGT73D1, UDP-glucosyl transferase 73D1                                                                      | 1.60                   |
| 19  | protein degradation, cysteine protease                                                        | At4g36880 | CP1 (CYSTEINE PROTEINASE1, cysteine-type endopeptidase)                                                     | 1.94                   |
| 20  | protein degradation, subtilases                                                               | At1g32940 | SBT3.5 (identical protein binding/serine-type endopeptidase)                                                | 1.50                   |
| 21  | protein postranslational modification                                                         | At2g34180 | CIPK13 (CBL-INTERACTING PROTEIN KINASE 13, ATP binding/kinase/protein kinase)                               | 1.20                   |
| 22  | protein synthesis, ribosomal protein, eukaryotic 60S subunit L34                              | At3g01175 | unknown function                                                                                            | 1.35                   |
| 23  | redox glutaredoxins                                                                           | At1g28480 | GRX480 (electron carrier/protein disulfide oxidoreductase)                                                  | 1.14                   |
| 24  | RNA regulation of transcription, MYB domain transcription factor family, secondary metabolism | At1g18570 | MYB51 (MYB DOMAIN PROTEIN 51, DNA binding/transcription factor)                                             | 1.38                   |
| 25  | RNA regulation of transcription, unclassified                                                 | At3g59080 | aspartyl protease family protein                                                                            | 1.14                   |

|           |                                                                          |           |                                                              |       |
|-----------|--------------------------------------------------------------------------|-----------|--------------------------------------------------------------|-------|
| <b>26</b> | RNA regulation of transcription, WRKY domain transcription factor family | At2g40750 | WRKY54 (transcription factor)                                | 2.41  |
| <b>27</b> | RNA regulation of transcription, WRKY domain transcription factor family | At3g56400 | WRKY70 (transcription factor/transcription repressor)        | 2.12  |
| <b>28</b> | secondary metabolism, flavonoids, anthocyanins                           | At2g22590 | transferase, transferring glycosyl groups   chr2             | -1.87 |
| <b>29</b> | calcium signaling                                                        | At1g76650 | CML38 (calcium-binding EF hand family protein)               | -1.14 |
| <b>30</b> | calcium signaling                                                        | At2g41100 | TCH3 (TOUCH 3, calcium ion binding)                          | 1.59  |
| <b>31</b> | calcium signaling                                                        | At3g63380 | ACA12 (calcium-transporting ATPase, putative)                | 1.60  |
| <b>32</b> | calcium signaling                                                        | At4g33050 | EDA39 (embryo sac development arrest 39, calmodulin binding) | 1.57  |
| <b>33</b> | light signaling                                                          | At3g26740 | CCL (CCR-LIKE)                                               | -1.17 |
| <b>34</b> | light signaling                                                          | At4g14690 | ELIP2 (EARLY LIGHT-INDUCIBLE PROTEIN 2, chlorophyll binding) | -1.71 |
| <b>35</b> | signaling, receptor kinases                                              | At1g51890 | leucine-rich repeat protein kinase, putative                 | 1.02  |
| <b>36</b> | abiotic stress, unspecified                                              | At1g18970 | <i>GLP4</i> (GERMIN-LIKE PROTEIN, manganese ion binding)     | 1.49  |
| <b>37</b> | abiotic stress, unspecified                                              | At1g18980 | germin-like protein                                          | 1.20  |
| <b>38</b> | biotic stress                                                            | At2g38870 | protease inhibitor                                           | 1.00  |
| <b>39</b> | biotic stress                                                            | At2g43590 | chitinase                                                    | 1.55  |
| <b>40</b> | biotic stress, PR-proteins                                               | At3g50950 | disease resistance protein CC-NBS-LRR class                  | 1.13  |
| <b>41</b> | not assigned, no ontology                                                | At4g20000 | VQ motif-containing protein                                  | 1.40  |
| <b>42</b> | not assigned, no ontology                                                | At5g42010 | WD-40 repeat family protein                                  | 1.07  |
| <b>43</b> | not assigned, unknown                                                    | At1g19530 | unknown protein                                              | -1.71 |
| <b>44</b> | not assigned, unknown                                                    | At1g36640 | unknown protein                                              | 1.67  |
| <b>45</b> | not assigned, unknown                                                    | At1g72060 | serine-type endopeptidase inhibitor                          | -1.30 |
| <b>46</b> | not assigned, unknown                                                    | At3g56290 | unknown protein                                              | -1.05 |
| <b>47</b> | not assigned, unknown                                                    | At4g04990 | unknown protein                                              | 1.31  |
| <b>48</b> | not assigned, unknown                                                    | At5g22270 | unknown protein                                              | 1.58  |

**Table S1B.** Common genes up- or down-regulated at [2 and 6] days after co-cultivation.

| Nr. | BinName                                                                                          | AGI       | Description                                                                                                                                | 2 d + <i>P. indica</i> | 6 d + <i>P. indica</i> |
|-----|--------------------------------------------------------------------------------------------------|-----------|--------------------------------------------------------------------------------------------------------------------------------------------|------------------------|------------------------|
| 1   | cell wall, HRGP                                                                                  | At1g26240 | proline-rich extensin-like family protein                                                                                                  | 2.86                   | 1.6                    |
| 2   | cell organisation                                                                                | At1g10340 | ankyrin repeat family protein                                                                                                              | 1.12                   | 1.09                   |
| 3   | cell organisation                                                                                | At4g14365 | C3HC4-type RING finger family protein/ankyrin repeat family protein                                                                        | 1.83                   | 1.04                   |
| 4   | development, storage proteins                                                                    | At2g26560 | PLA2A PHOSPHOLIPASE A 2A, lipase/ nutrient reservoir                                                                                       | 3.19                   | 1.13                   |
| 5   | development, unspecified                                                                         | At2g43000 | anac042 Arabidopsis NAC domain containing protein 42, transcription factor                                                                 | 2.84                   | 1.25                   |
| 6   | hormone metabolism, jasmonate.synthesis-degradation, 12-Oxo-PDA-reductase                        | At1g18020 | 12-oxophytodienoate reductase                                                                                                              | 1.39                   | 1.36                   |
| 7   | lipid metabolism, lipid degradation                                                              | At2g39400 | hydrolase, alpha/beta fold family protein                                                                                                  | 1.13                   | 1.44                   |
| 8   | GDSL-motif lipase                                                                                | At5g40990 | GLIP1 GDSL LIPASE1, carboxylesterase/lipase                                                                                                | 3.66                   | 1.45                   |
| 9   | glutathione S transferases                                                                       | At1g02930 | ATGSTF6, GST1, ERD11, ATGSTF3, GSTF6   ATGSTF6 GLUTATHIONE S-TRANSFERASE, copper ion binding / glutathione binding/glutathione transferase | 2.89                   | 1.06                   |
| 10  | glutathione S transferases                                                                       | At1g14540 | anionic peroxidase                                                                                                                         | 2.05                   | 1.13                   |
| 11  | glutathione S transferases                                                                       | At1g14550 | anionic peroxidase                                                                                                                         | 1.97                   | 1.52                   |
| 12  | glutathione S transferases                                                                       | At1g74590 | GSTU10 GLUTATHIONE S-TRANSFERASE TAU 10, glutathione transferase                                                                           | 2.07                   | 1.02                   |
| 13  | nitrilases, nitrile lyases, berberine bridge enzymes, reticuline oxidases, troponine reductases  | At1g26380 | FAD-binding domain-containing protein                                                                                                      | 4.27                   | 1.64                   |
| 14  | nitrilases, *nitrile lyases, berberine bridge enzymes, reticuline oxidases, troponine reductases | At1g26390 | FAD-binding domain-containing protein                                                                                                      | 4.97                   | 2.15                   |
| 15  | O-methyl transferases                                                                            | At1g21110 | O-methyltransferase                                                                                                                        | 1.63                   | 1.5                    |
| 16  | O-methyl transferases                                                                            | At1g21120 | O-methyltransferase                                                                                                                        | 2.43                   | 1.76                   |
| 17  | O-methyl transferases                                                                            | At1g21130 | O-methyltransferase                                                                                                                        | 2                      | 1.8                    |
| 18  | peroxidases                                                                                      | At3g03670 | peroxidase                                                                                                                                 | 1.05                   | 1.77                   |
| 19  | peroxidases                                                                                      | At5g39580 | peroxidase                                                                                                                                 | 3.25                   | 1.61                   |
| 20  | protein degradation, ubiquitin, E3, RING                                                         | At3g61390 | U-box domain-containing protein                                                                                                            | 1.07                   | 1.26                   |
| 21  | secondary metabolism, phenylpropanoids                                                           | At5g42830 | transferase family protein                                                                                                                 | 1.98                   | 1.09                   |
| 22  | secondary metabolism, sulfur-containing glucosinolates, cytochrome P450 monooxygenase            | At5g57220 | CYP81F2; electron carrier/ heme binding/iron ion binding /monooxygenase/oxygen binding                                                     | 4.23                   | 1.82                   |
| 23  | calcium signaling                                                                                | At5g26920 | CBP60G CAM-BINDING PROTEIN 60-LIKE.G, calmodulin binding                                                                                   | 4.04                   | 1.72                   |
| 24  | calcium signaling                                                                                | At5g39670 | calcium-binding EF hand family protein                                                                                                     | 1.54                   | 1.26                   |

|           |                                                 |           |                                                                                 |       |      |
|-----------|-------------------------------------------------|-----------|---------------------------------------------------------------------------------|-------|------|
| <b>25</b> | light signaling                                 | At3g22840 | ELIP1 EARLY LIGHT-INDUCABLE PROTEIN, chlorophyll binding                        | -2.37 | -1   |
| <b>26</b> | signaling, MAP kinases                          | At1g01560 | ATMPK11; MAP kinase/ kinase                                                     | 1.27  | 1.57 |
| <b>27</b> | abiotic stress, unspecified                     | At4g14630 | GLP9 GERMIN-LIKE PROTEIN 9, manganese ion binding/nutrient reservoir            | 1.92  | 1.76 |
| <b>28</b> | biotic stress                                   | At2g15120 | pseudogene, disease-resistance family protein/fatty acid elongase-related       | 2.36  | 1.22 |
| <b>29</b> | biotic stress                                   | At2g43570 | chitinase                                                                       | 2.61  | 1.68 |
| <b>30</b> | biotic stress, PR-proteins, plant defensins     | At2g43510 | ATT11, serine-type endopeptidase inhibitor                                      | 2.23  | 1.03 |
| <b>31</b> | biotic stress, signalling                       | At5g64905 | PROPEP3 Elicitor peptide 3 precursor                                            | 1.7   | 1.26 |
| <b>32</b> | not assigned, no ontology                       | At2g26400 | ATARD3 ACIREDUCTONE DIOXYGENASE 3, acireductone dioxygenase [ironII]-requiring] | 1.67  | 1.41 |
| <b>33</b> | not assigned, no ontology                       | At4g10500 | oxidoreductase                                                                  | 2.82  | 1.73 |
| <b>34</b> | not assigned, no ontology                       | At5g38900 | DSBA oxidoreductase family protein                                              | 2.57  | 1.18 |
| <b>35</b> | not assigned, no ontology, glycine rich protein | At4g37900 | glycine-rich protein                                                            | 1.04  | 1.25 |
| <b>36</b> | not assigned, unknown                           | At1g22890 | unknown protein                                                                 | 1.68  | 1.27 |
| <b>37</b> | not assigned, unknown                           | At2g18690 | unknown protein                                                                 | 1.13  | 1.02 |
| <b>38</b> | not assigned, unknown                           | At3g18250 | unknown protein                                                                 | 2.04  | 1.64 |
| <b>39</b> | not assigned, unknown                           | At4g28460 | unknown protein                                                                 | 2.7   | 2.04 |
| <b>40</b> | not assigned, unknown                           | At4g37290 | unknown protein                                                                 | 2.54  | 1.2  |
| <b>41</b> | not assigned, unknown                           | At1g26250 | proline-rich extensin protein                                                   | 1.03  | 1.29 |



**Table S1C.** Genes up- or down-regulated only at six days after co-cultivation.

| <b>Nr.</b> | <b>BinName</b>                                                      | <b>AGI</b> | <b>Description</b>                                                                   | <b>6 d + <i>P. indica</i></b> |
|------------|---------------------------------------------------------------------|------------|--------------------------------------------------------------------------------------|-------------------------------|
| <b>1</b>   | glycolysis, cytosolic branch                                        | At5g04120  | phosphoglycerate/bisphosphoglycerate mutase family protein                           | -1.16                         |
| <b>2</b>   | fermentation                                                        | At1g77120  | ADH1 ALCOHOL DEHYDROGENASE 1                                                         | 1.58                          |
| <b>3</b>   | cytochrome P450                                                     | At4g31940  | CYP82C4; electron carrier/heme binding/iron ion binding monooxygenase/oxygen binding | -1.04                         |
| <b>4</b>   | O-methyl transferases                                               | At1g21100  | O-methyltransferase                                                                  | 1.24                          |
| <b>5</b>   | metal transport                                                     | At4g23700  | ATCHX17 CATION/H <sup>+</sup> EXCHANGER 17                                           | 1.16                          |
| <b>6</b>   | transport membrane system, unknown                                  | At4g25220  | transporter                                                                          | -1.15                         |
| <b>7</b>   | secondary metabolism, phenylpropanoids, lignin biosynthesis, CCoAMT | At1g67980  | CCoAMT; caffeoyl-CoA O-methyltransferase                                             | 1.22                          |
| <b>8</b>   | hormone metabolism, ethylene signal transduction                    | At5g51190  | AP2 domain-containing transcription factor                                           | 1.08                          |
| <b>9</b>   | biotic stress, signaling, MLO-like                                  | At1g61560  | MLO6 MILDEW RESISTANCE LOCUS O, calmodulin binding                                   | 1.03                          |
| <b>10</b>  | redox ascorbate and glutathione ascorbate                           | At4g39830  | L-ascorbate oxidase                                                                  | 1.36                          |
| <b>11</b>  | protein degradation, AAA type                                       | At5g40010  | AATP1 AAA-ATPase 1                                                                   | 1.15                          |
| <b>12</b>  | receptor kinases signaling, S-locus glycoprotein like               | At1g61500  | S-locus protein kinase                                                               | 1.25                          |
| <b>13</b>  | not assigned, unknown                                               | At4g04630  | unknown protein                                                                      | 1                             |

**Table S1D.** 33 genes were randomly chosen and their regulation was tested by Real-time PCR analysis.

| Nr. | Gene      | Gene name                                           | 2 d + <i>P.indica</i><br>(Real-Time PCR) | 2 d + <i>P. indica</i><br>(microarray) | 6 d + <i>P. indica</i><br>(Real-Time PCR) | 6 d + <i>P. indica</i><br>(microarray) |
|-----|-----------|-----------------------------------------------------|------------------------------------------|----------------------------------------|-------------------------------------------|----------------------------------------|
| 1   | At1g42970 | GAPB                                                | -0.64                                    | -0.43                                  | 0.42                                      | 0.22                                   |
| 2   | At4g38970 | fructose-bisphosphate aldolase                      | -0.77                                    | -0.56                                  | 0.20                                      | 0.29                                   |
| 3   | At1g20190 | ATEXPA11                                            | 0.71                                     | 0.02                                   | 0.23                                      | 0.13                                   |
| 4   | At4g25700 | BETA-OHASE 1                                        | -0.80                                    | -0.29                                  | 0.07                                      | 0.11                                   |
| 5   | At5g57220 | CYP81F2                                             | 3.80                                     | 4.23                                   | 0.11                                      | 1.82                                   |
| 6   | At1g18570 | MYB51                                               | 1.81                                     | 1.38                                   | 0.81                                      | 0.94                                   |
| 7   | At5g51190 | AP2 domain-containing transcription factor          | -0.78                                    | -0.32                                  | 1.57                                      | 1.08                                   |
| 8   | At2g43590 | chitinase                                           | 2.25                                     | 1.55                                   | 1.30                                      | 0.97                                   |
| 9   | At2g43510 | ATT1; serine-type endopeptidase inhibitor           | 1.55                                     | 2.23                                   | 1.17                                      | 1.03                                   |
| 10  | At5g38910 | germin-like protein                                 | 4.81                                     | 6.53                                   | 2.06                                      | 2.42                                   |
| 11  | At1g28480 | GRX480                                              | 1.57                                     | 1.14                                   | 0.80                                      | 0.88                                   |
| 12  | At1g26390 | FAD-binding domain-containing protein               | 5.35                                     | 4.97                                   | 2.75                                      | 2.15                                   |
| 13  | At1g02930 | ATGSTF6                                             | 3.16                                     | 2.89                                   | 1.46                                      | 1.06                                   |
| 14  | At4g31940 | CYP82C4                                             | 0.88                                     | 0.98                                   | -1.26                                     | -1.04                                  |
| 15  | At5g57220 | CYP81F2                                             | 3.51                                     | 4.23                                   | 2.73                                      | 1.82                                   |
| 16  | At5g39580 | peroxidase                                          | 4.01                                     | 3.25                                   | 1.24                                      | 1.61                                   |
| 17  | At1g18570 | MYB51                                               | 2.03                                     | 1.38                                   | 0.65                                      | 0.94                                   |
| 18  | At2g40750 | WRKY54                                              | 2.29                                     | 2.41                                   | 0.10                                      | 0.26                                   |
| 19  | At1g61500 | S-locus protein kinase                              | 0.62                                     | 0.58                                   | 1.80                                      | 1.25                                   |
| 20  | At1g76650 | CML38                                               | -1.01                                    | -1.14                                  | 0.41                                      | 0.72                                   |
| 21  | At5g26920 | CBP60G                                              | 3.01                                     | 4.04                                   | 2.04                                      | 1.72                                   |
| 22  | At4g14690 | ELIP2                                               | -2.15                                    | -1.71                                  | -0.40                                     | -0.75                                  |
| 23  | At3g60270 | Cupredoxin superfamily protein                      | 4.27                                     | 3.40                                   | 2.29                                      | 1.41                                   |
| 24  | At4g10500 | oxidoreductase, 2OG-Fe(II) oxygenase family protein | 2.37                                     | 2.82                                   | 0.92                                      | 1.73                                   |
| 25  | At5g37510 | EMB                                                 | 0.30                                     | 0.00                                   | 0.03                                      | -0.22                                  |
| 26  | At2g40890 | CYP89                                               | 0.27                                     | 0.42                                   | 0.00                                      | 0.03                                   |
| 27  | At3g48730 | GSA                                                 | 0.57                                     | 0.14                                   | -0.23                                     | 0.01                                   |
| 28  | At1g03630 | PORC                                                | -0.23                                    | 0.13                                   | 0.40                                      | -0.02                                  |
| 29  | At3g04720 | PR4                                                 | 0.00                                     | 0.54                                   | -1.86                                     | -0.02                                  |
| 30  | At3g12500 | PR3                                                 | 1.36                                     | 1.02                                   | 3.49                                      | -0.02                                  |
| 31  | At5g44420 | PDF1.2                                              | 0.47                                     | -1.07                                  | -1.43                                     | -0.32                                  |
| 32  | At2g43790 | MPK6                                                | 0.10                                     | 0.02                                   | -0.86                                     | 0.00                                   |
| 33  | At2g38120 | AUX1                                                | 0.13                                     | -0.10                                  | 0.27                                      | -0.15                                  |

**Table S2.** Regulated genes in *A. thaliana* roots after two days interaction with *P. indica* grown on normal or split Petri dishes (\*PD = Petri dish).

| Nr. | Gene      | Gene name                                           | 2 d + <i>P. indica</i><br>Normal PD* | 2 d + <i>P. indica</i><br>Split PD* |
|-----|-----------|-----------------------------------------------------|--------------------------------------|-------------------------------------|
| 1   | At1g42970 | <i>GAPB</i>                                         | -0.64                                | 0.08                                |
| 2   | At4g38970 | fructose-bisphosphate aldolase                      | -0.77                                | 0.13                                |
| 3   | At1g20190 | <i>EXPA11</i>                                       | 0.71                                 | 0.34                                |
| 4   | At4g25700 | <i>BETA-OHASE 1</i>                                 | -0.80                                | 0.22                                |
| 5   | At5g57220 | <i>CYP81F2</i>                                      | 3.80                                 | -0.15                               |
| 6   | At1g18570 | <i>MYB51</i>                                        | 1.81                                 | 0.36                                |
| 7   | At5g51190 | AP2 domain-containing transcription factor          | -0.78                                | 0.12                                |
| 8   | At2g43590 | chitinase                                           | 2.25                                 | 0.68                                |
| 9   | At2g43510 | <i>ATT11</i> ; serine-type endopeptidase inhibitor  | 1.55                                 | 0.47                                |
| 10  | At5g38910 | germin-like protein                                 | 4.81                                 | -0.30                               |
| 11  | At1g28480 | <i>GRX480</i>                                       | 1.57                                 | 0.08                                |
| 12  | At1g26390 | FAD-binding domain-containing protein               | 5.35                                 | 0.60                                |
| 13  | At1g02930 | <i>GSTF6</i>                                        | 3.16                                 | -0.04                               |
| 14  | At4g31940 | <i>CYP82C4</i>                                      | 0.88                                 | -0.36                               |
| 15  | At5g57220 | <i>CYP81F2</i>                                      | 3.51                                 | 0.04                                |
| 16  | At5g39580 | peroxidase                                          | 4.01                                 | 0.42                                |
| 17  | At1g18570 | <i>MYB51</i>                                        | 2.03                                 | 0.76                                |
| 18  | At2g40750 | <i>WRKY54</i>                                       | 2.29                                 | 0.51                                |
| 19  | At1g61500 | S-locus protein kinase                              | 0.62                                 | 0.06                                |
| 20  | At1g76650 | <i>CML38</i>                                        | -1.01                                | 0.35                                |
| 21  | At5g26920 | <i>CBP60G</i>                                       | 3.01                                 | 0.12                                |
| 22  | At4g14690 | <i>ELIP2</i>                                        | -2.15                                | -0.07                               |
| 23  | At3g60270 | Cupredoxin superfamily protein                      | 4.27                                 | 0.64                                |
| 24  | At4g10500 | oxidoreductase, 2OG-Fe(II) oxygenase family protein | 2.37                                 | 0.05                                |
| 25  | At5g37510 | <i>EMB</i>                                          | 0.30                                 | 0.27                                |
| 26  | At2g40890 | <i>CYP89</i>                                        | 0.27                                 | -0.30                               |
| 27  | At3g48730 | <i>GSA</i>                                          | 0.57                                 | 0.15                                |
| 28  | At1g03630 | <i>PORC</i>                                         | -0.23                                | 0.26                                |
| 29  | At3g04720 | <i>PR4</i>                                          | 0.00                                 | -0.69                               |
| 30  | At3g12500 | <i>PR3</i>                                          | 1.36                                 | -0.01                               |
| 31  | At5g44420 | <i>PDF1.2</i>                                       | 0.47                                 | 0.84                                |
| 32  | At2g43790 | <i>MPK6</i>                                         | 0.10                                 | 0.11                                |
| 33  | At2g38120 | <i>AUX1</i>                                         | 0.13                                 | 0.48                                |

**Table S3.** List of primers for RT-PCR used in this study.

| Gene      | Forward primer (5' - 3')  | Reverse primer (5' - 3') |
|-----------|---------------------------|--------------------------|
| At1g03630 | CACATACGCTGTTTCGGCTTC     | AGACTAGGGTCACTCACAACCTG  |
| At1g42970 | ACTCCTACACCGGAGACCAAAG    | GCTGCGGCAACTAATGACAC     |
| At2g38120 | CAGCTGCGCATCTAACCAAGTG    | GATGAGATAAGCAGTCCAGCTTCC |
| At2g43790 | GGGTGCTTATGGCATCGTTTGTTTC | ATCGCAACGCTCTCGTTAGTTTC  |
| At2g40890 | ACAGCATTTGTTGATGCGTTGC    | CCCTGCCGTGATCATATCCCATAG |
| At3g48730 | TGGATTCTGCAAAGGGCTCACG    | TCAGCCAAAGCAGCAAGAACCTC  |
| At3g60270 | TGCAGCCTTGGCATGAAACTCG    | ACGGTGGAGGCTCTAATGAAACG  |
| At4g25700 | GGCATAACGGTGTGGTGAATCGC   | CTTGTCTGTGTGATGTAGCTGGTG |
| At4g38970 | ATACGCTGCCATTTACAGGAC     | TGTCGTGTTCTCCATCCAACAAG  |
| At5g26920 | CGATAGGACCTTTGTGGGTCATCC  | ACTTCCTTGAAAGTCGATGTGCTG |
| At5g37510 | TCGGTGTATCCAGTGTACAAGGTG  | CAATTTCTCTCCACTACCACGAC  |
| At5g39580 | GCGATCTCGTCACTCTTGTGGAG   | TAAACCCACATGCAGCTGTTCCG  |
| At5g57220 | CATCATCAAAGGGCTCATGCTCAG  | AATGTTACGGCCGAGTATCCG    |
| At1g26390 | ACGCCACAATGAGTAGCCTGAG    | TCACCACTCGATTGCTTCCAAC   |
| At1g20190 | GCTTCTGGAACAATGGGTGGAG    | AGCATTCTCCGCAAGAAGCTC    |
| At1g02930 | AGCCTTTCATCCTTCGCAACCC    | TGTCCTTGCCAGTTGAGAGAAGG  |
| At1g28480 | ACGGAGAGGATGTTGCATGTGTC   | AATCTCAAGGACCGCCGGATTG   |
| At1g76650 | AAGAGGGAAGATTAGCCGGAGAG   | CTCTGTTCTTGTCTCACCATTGC  |
| At1g18570 | CCTTCACGGCAACAAATGGTCTG   | TACCGGAGGTTATGCCCTTGTG   |
| At5g51190 | TCTAAGCCAACGCAAACCACCTC   | TTCTCTTGAACCACCGGTGCAG   |
| At2g43510 | AGGCTATCGTTTCCATCTTCGTTG  | TCTCCGGCACATCGGAAATGAC   |
| At1g61500 | AGATGCAGAGTGGAAACATATCGC  | CCTGGGACATCTTGTGGTTTCAG  |
| At4g14690 | CCACCAGTTAGCAAGCCTAAGGTG  | TGGACCGCTAAACGCTAGCAAATC |
| At2g40750 | CACTGCTCAGAACCATGTCAATGC  | TGCTGTCACACTGCTGGTGTTG   |
| At4g31940 | CAAATCTACCTGCCTGGCACTG    | TGGCCATGTAAGGGTTGATGC    |
| At2g43590 | ACTCACGAGACCGGACATTTCTGC  | TGGGTATTGTGTGTTGCTGCTCTG |
| At5g44420 | CTTGTGTGCTGGGAAGACATA     | AGCACAGAAGTTGTGCGAGAA    |
| At5g38910 | TCATTAAGCAAGGCTTCGGAC     | TTTGACGTGACAAACCCAACG    |
| At3g04720 | GACCTCGTGGTCAAGCTTCTT     | TTGCTACATCCAAATCCAAGC    |
| At3g12500 | TCATGGGGCTACTGTTTCAAG     | TATTGCTCTACCGCATAGACC    |
| At4g10500 | TATCGGCGACCAAATGCAGGTC    | ACTACGGCTCTATGGAGCACAC   |
